# Supplementary material for: The most prevalent rare coding variants of TREM2 conferring risk of Alzheimer's disease: A systematic review and meta-analysis
Source: PubMed Central journal article supplement — Exp Ther Med. 2021 Feb 11;21(4):347. doi: 10.3892/etm.2021.9778 (PMC7903442; doi:10.3892/etm.2021.9778), 2021-02-11

Figure S1. Forest plot for the association of triggering receptors expressed on myeloid cells 2 variant R47H with susceptibility to Alzheimer's disease in Caucasians. OR, odds ratio; M-H, Mantel-Haentzel method; d.f., degree of freedom.

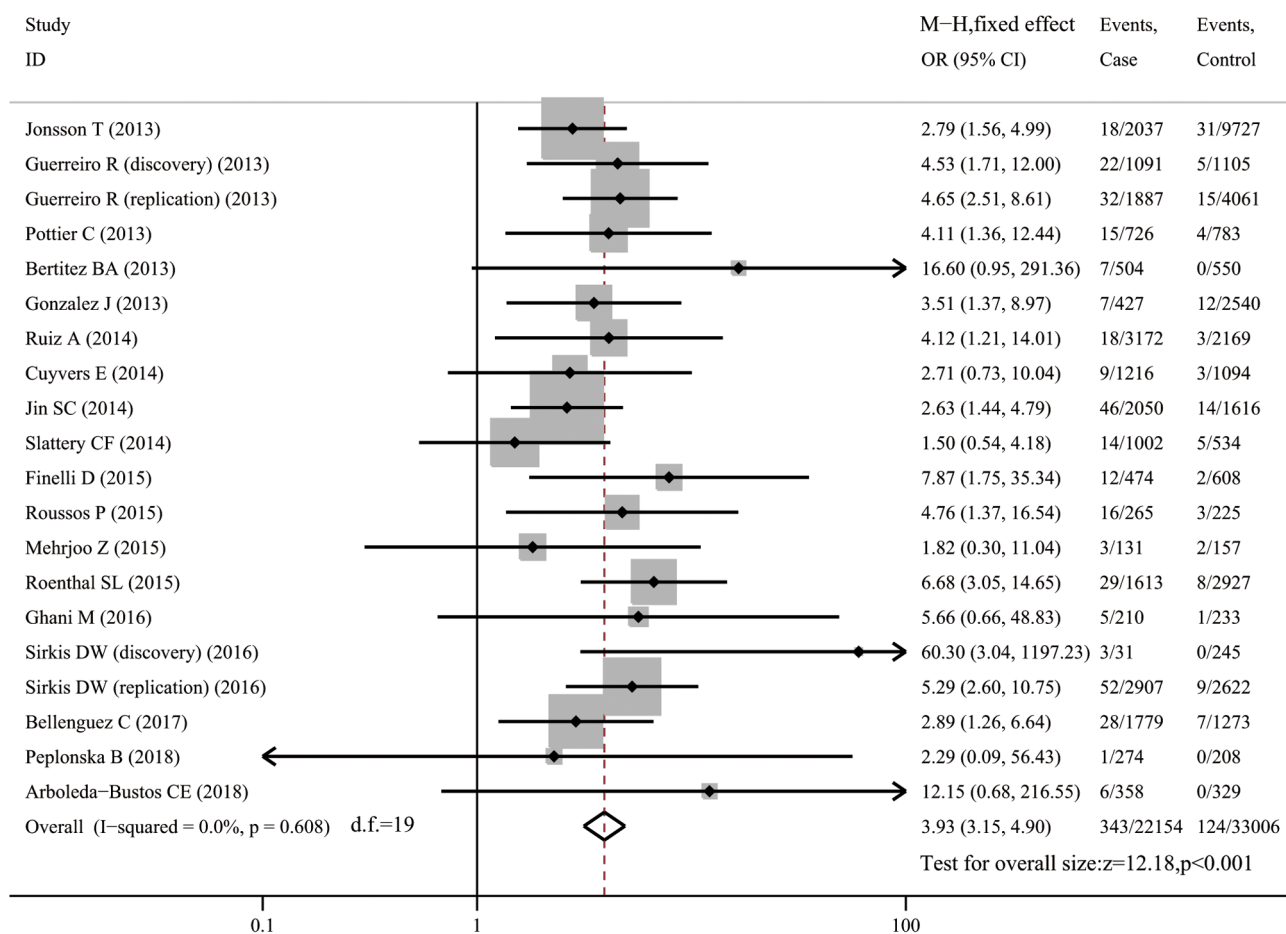

Figure S2. Forest plot for the association of triggering receptors expressed on myeloid cells 2 variant R47H with susceptibility to early-onset Alzheimer's disease. OR, odds ratio; M-H, Mantel-Haentzel method; d.f., degree of freedom.

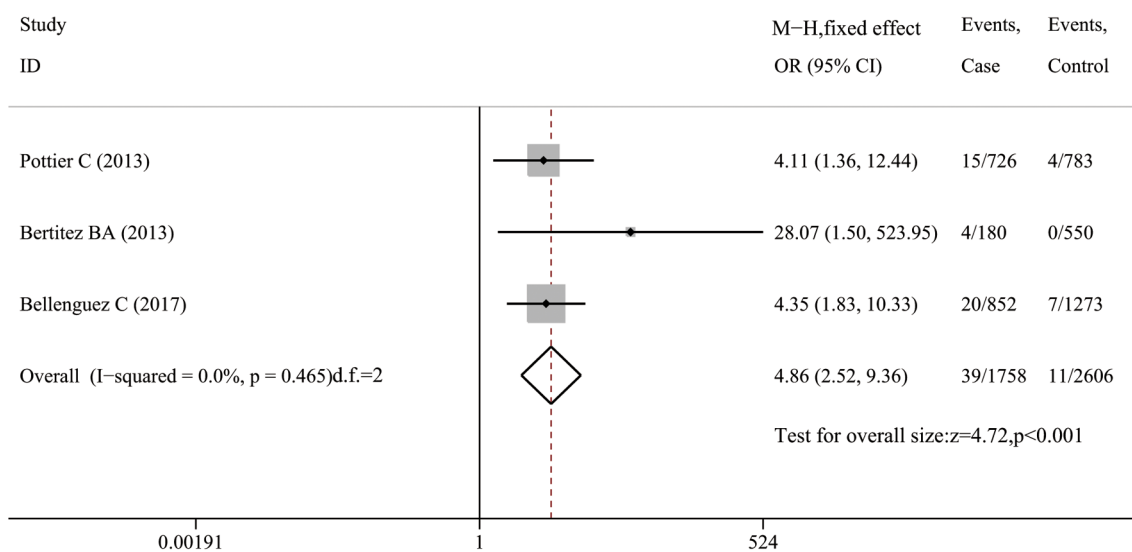

Figure S3. Forest plot for the association of triggering receptors expressed on myeloid cells 2 variant R62H with susceptibility to Alzheimer's disease in Caucasians. OR, odds ratio; M-H, Mantel-Haentzel method; d.f., degree of freedom.

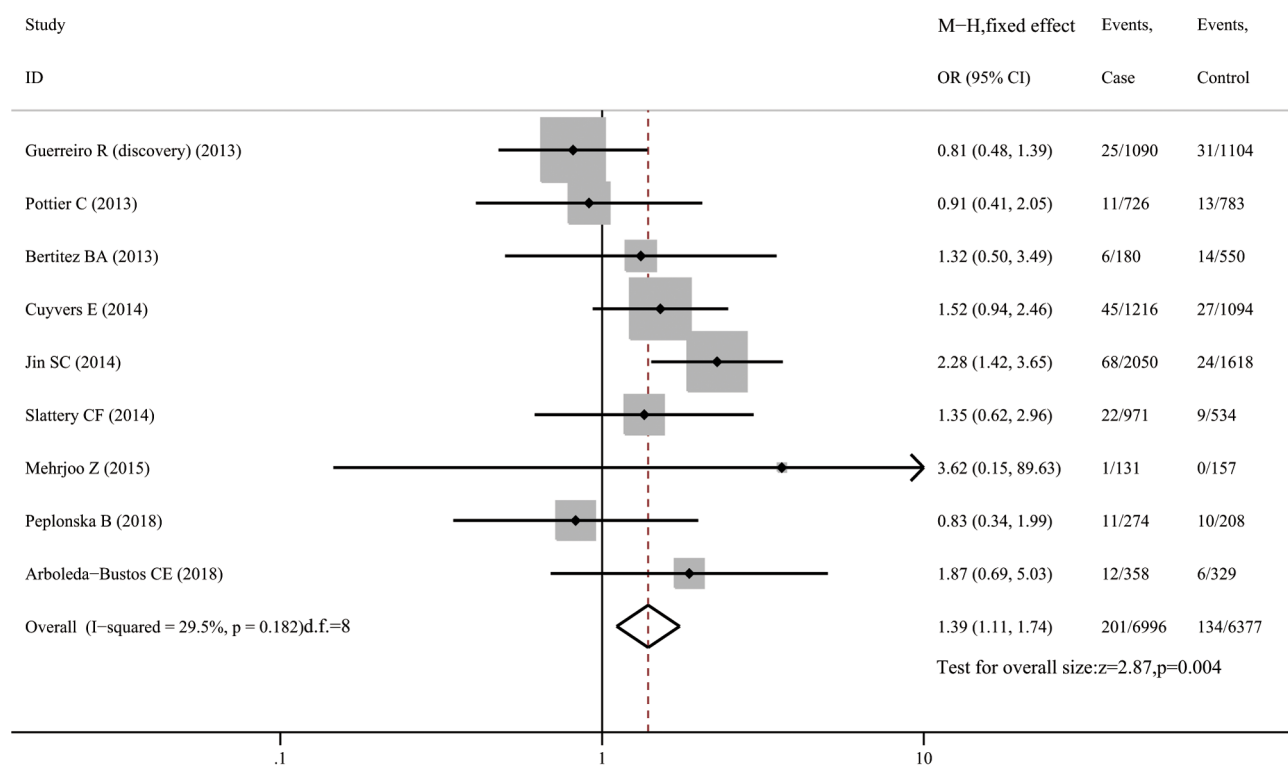

Figure S4. Forest plot for the association of triggering receptors expressed on myeloid cells 2 variant R62H with susceptibility to Alzheimer's disease after excluding the study by Jin *et al* (11). OR, odds ratio; M-H, Mantel-Haentzel method; d.f., degree of freedom.

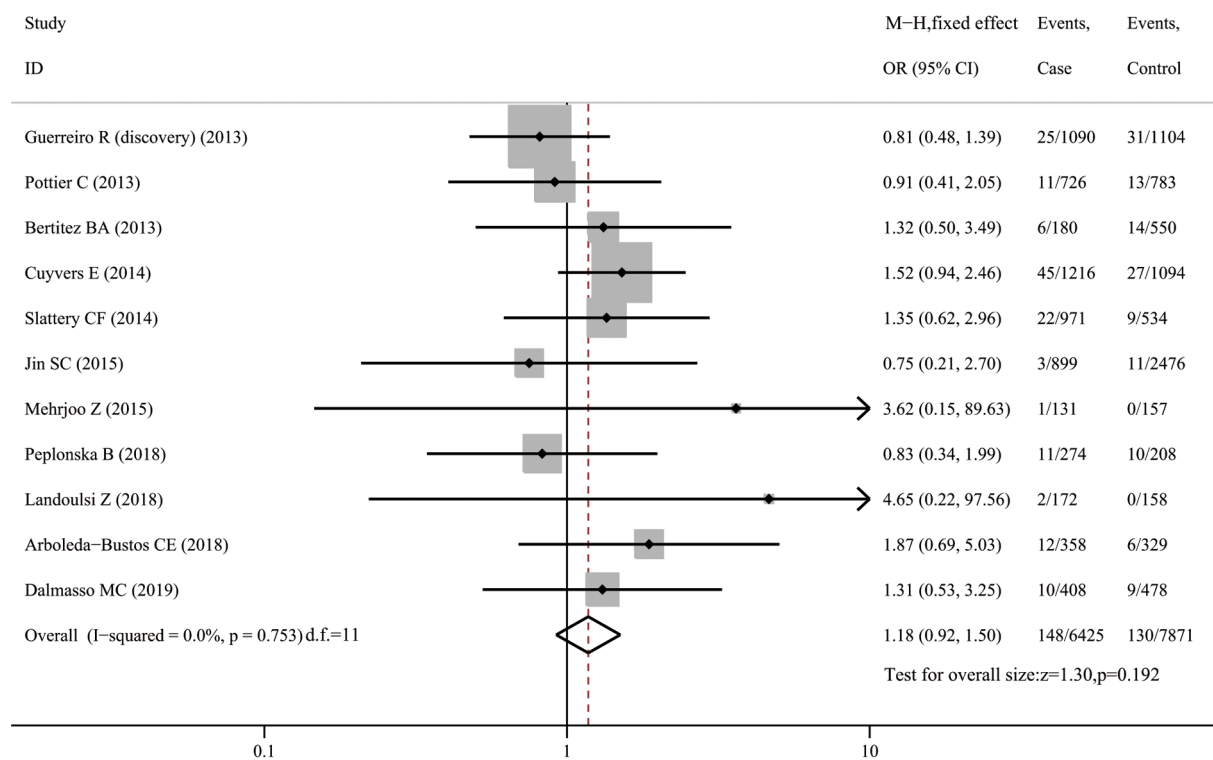

Figure S5. Forest plot for the association of triggering receptors expressed on myeloid cells 2 variant R62H with susceptibility to Alzheimer's disease in Caucasians after excluding the study by Jin *et al* (11). OR, odds ratio; M-H, Mantel-Haentzel method; d.f., degree of freedom.

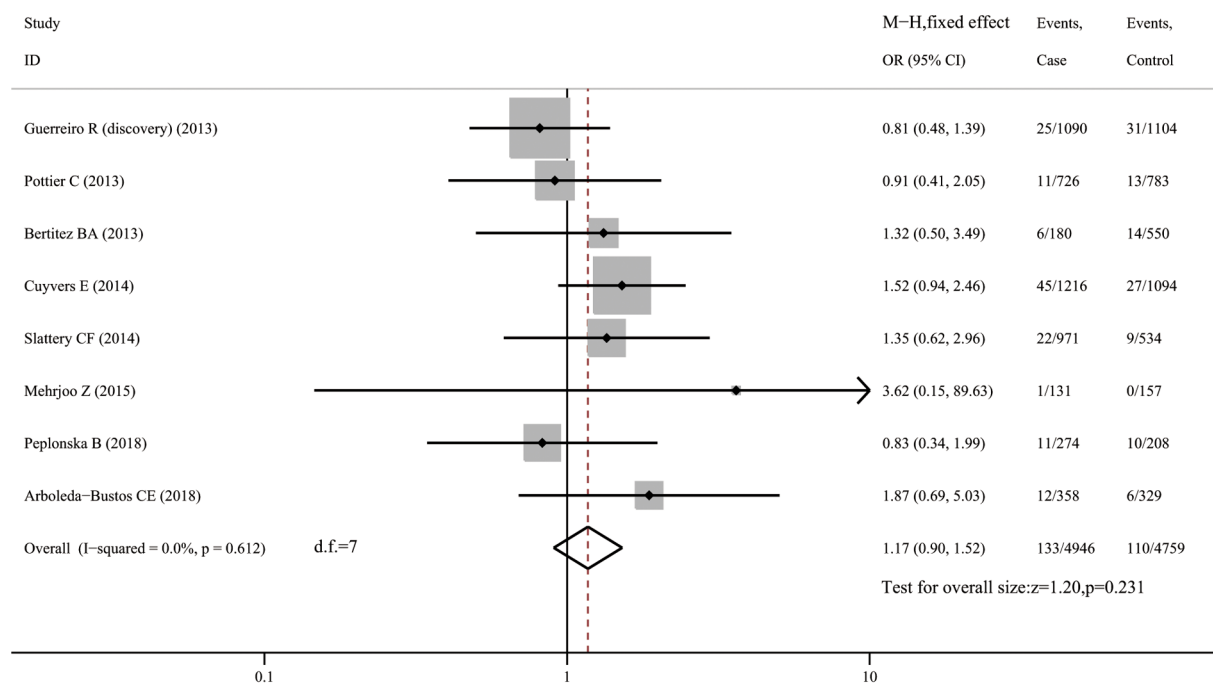

Figure S6. Forest plot for the association of triggering receptors expressed on myeloid cells 2 variant D87N with susceptibility to Alzheimer's disease in Caucasians. OR, odds ratio; M-H, Mantel-Haentzel method; d.f., degree of freedom.

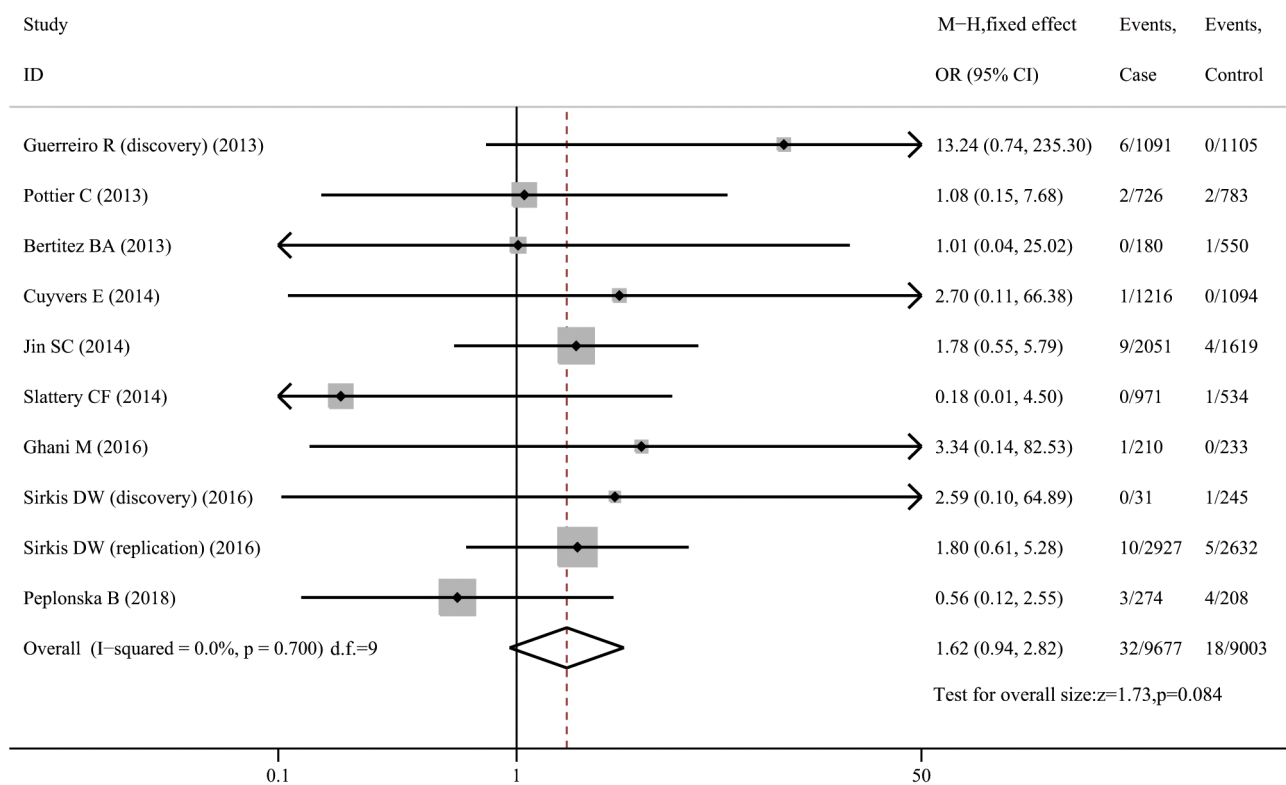

Figure S7. Forest plot for the association of triggering receptors expressed on myeloid cells 2 variant H157Y with susceptibility to Alzheimer's disease in Caucasians. OR, odds ratio; M-H, Mantel-Haentzel method; d.f., degree of freedom.

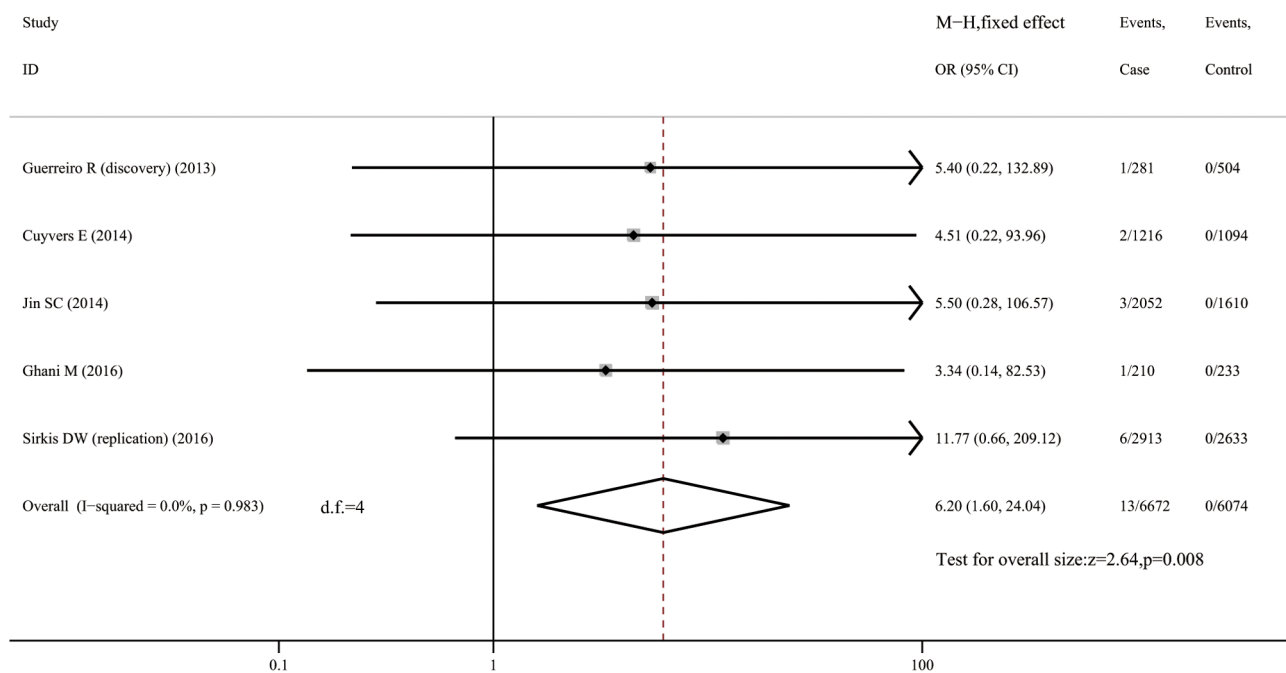

Figure S8. Forest plot for the association of triggering receptors expressed on myeloid cells 2 variant H157Y with susceptibility to Alzheimer's disease in Asians. OR, odds ratio; D-L, DerSimonian-Laird method; d.f., degree of freedom.

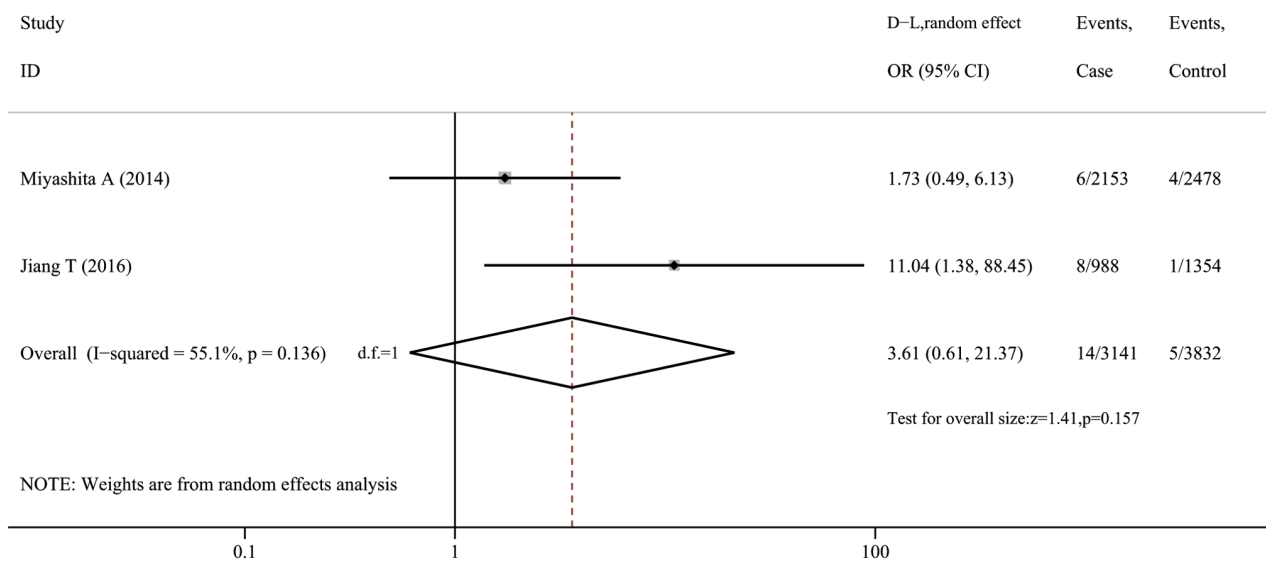

Supplement: Supplementary_Data.pdf [file Supplementary_Data.pdf]
